# Supplementary material
Source: publisher site journal article supplement (https://www.spandidos-publications.com/2274/downloadSupplementary)

Figure S1. Reverse transcription-quantitative PCR assay results of Huwe1. Primary cortex neuronal cells were infected with lentivirus shRNA-Huwe1 or lentivirus scramble control at 24 h. shRNA-Huwe1 decreased the mRNA expression of Huwe1, compared with lentivirus scramble control. GAPDH was used as an internal control. #P<0.05 vs. V-ctrl group. V-ctrl, treatment with lentivirus GFP scramble control; shRNA, short hairpin RNA; Huwe1, HECT, UBA and WWE domain containing E3 ubiquitin protein ligase 1.

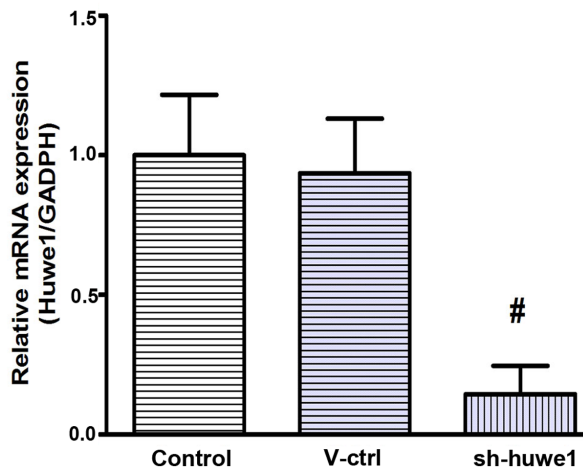

Supplement: Supplementary file 1 [file downloadSupplementary]
